# Supplementary material for: Novel 1,2,3-Triazole Erlotinib Derivatives as Potent IDO1 Inhibitors: Design, Drug-Target Interactions Prediction, Synthesis, Biological Evaluation, Molecular Docking and ADME Properties Studies
Source: Front Pharmacol. 2022 May 23;13:854965. doi: 10.3389/fphar.2022.854965 (PMC9168369; doi:10.3389/fphar.2022.854965)
Supplement: Supplementary file 1 [file DataSheet1.docx]

**Novel** **1,2,3-****Triazole** **Erlotinib Derivatives as Potent IDO1 Inhibitors: Design, Drug-Target Interactions Prediction, Synthesis, Biological Evaluation, Molecular Docking and ADME Properties Studies**

Gui-Qing Xu1†, Xiao-Qing Gong2†, Ying-Ying Zhu1, Xiao-Jun Yao2, Li-Zeng Peng3, Ge Sun4, Jian-Xue Yang5,6*, Long-Fei Mao1,3*

1Henan Engineering Research Center of Chiral Hydroxyl Pharmaceutical, School of Chemistry and Chemical Engineering, Henan Normal University, Xinxiang, China.

2College of Chemistry and Chemical Engineering, Lanzhou University, Lanzhou, China.

3Key Laboratory of Agro-Products Processing Technology of Shandong Province, Key Laboratory of Novel Food Resources Processing Ministry of Agriculture, Institute of Agro-Food Science and Technology Shandong Academy of Agricultural Sciences, Jinan, China

4The Third Affiliated Hospital of Guangzhou University of Chinese Medicine, Guangzhou, China

5Department of Neurology, The First Affiliated Hospital of Henan University of Science and Technology, Luoyang, China.

6School of Nursing, Henan University of Science and Technology, Luoyang, China

†These authors have contributed equally to this work and share first authorship

*Corresponding authors:

Docyjx1969@126.com

longfeimao1988@163.com

# Figure S1. The docking binding mode of compound a (wheat) with IDO1.


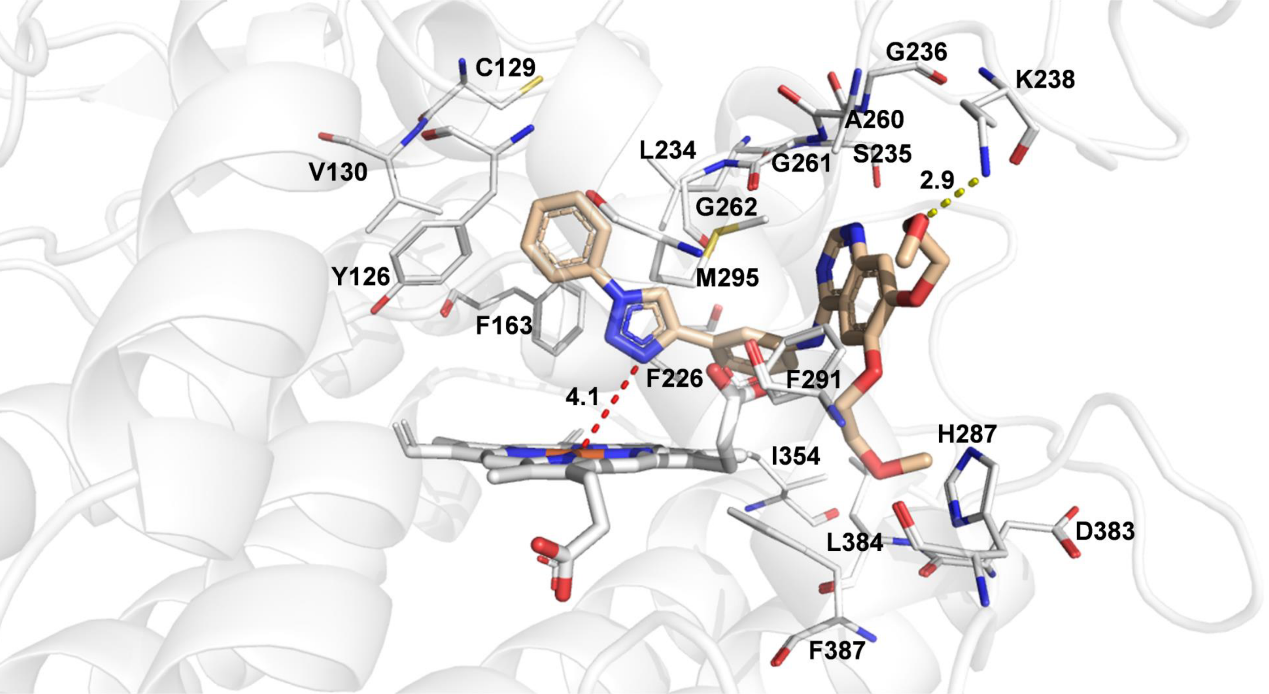


# Figure S2. The docking binding mode of compound c (purple) with IDO1.


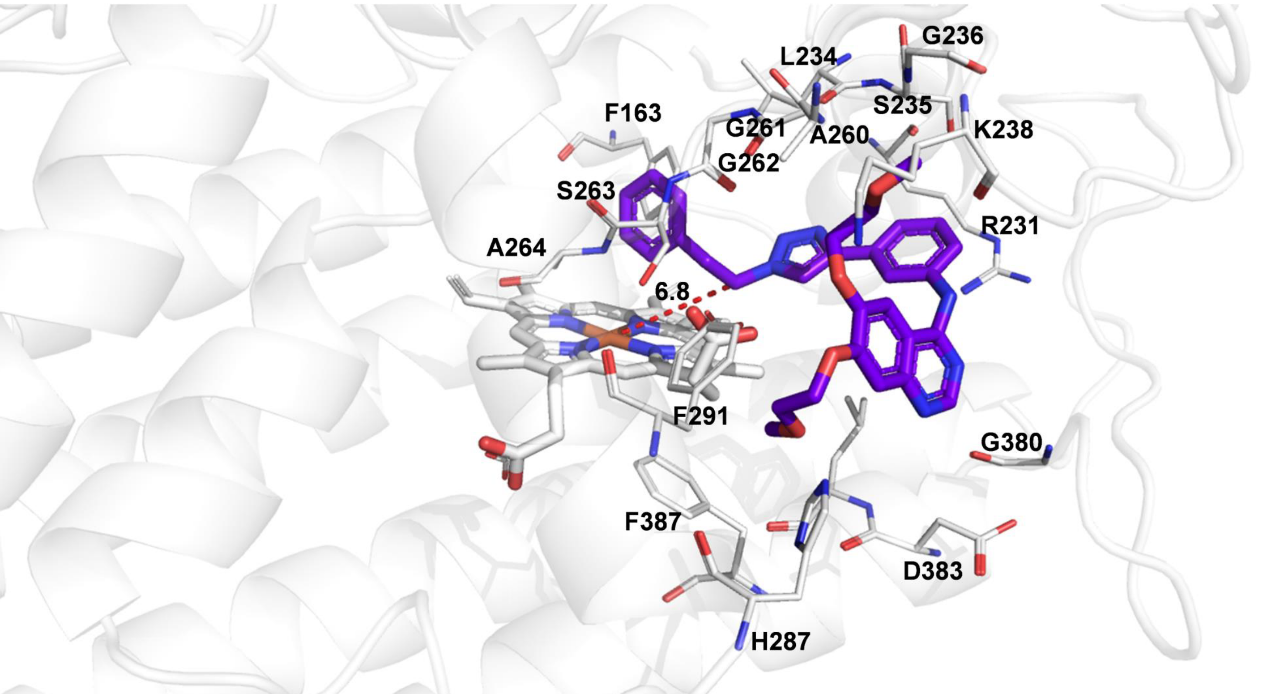


# Figure S3. The docking binding mode of compound erlotinib (pale-yellow) with IDO1.


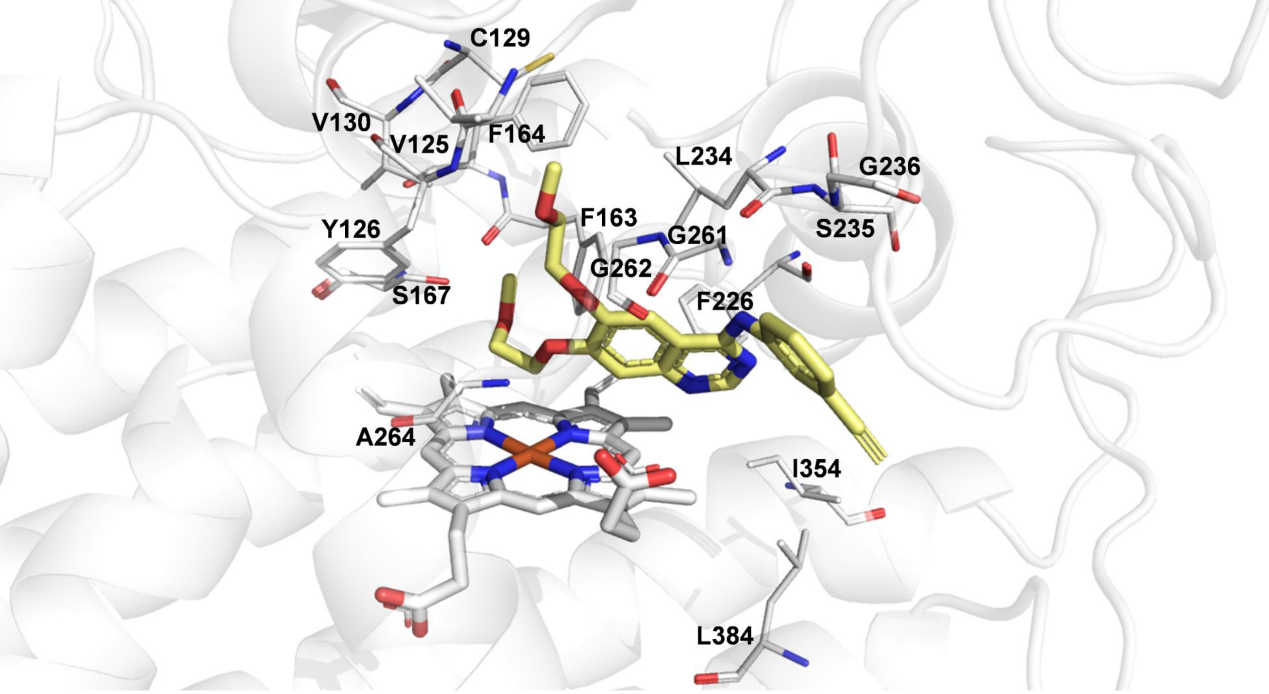


# Figure S4-1. 1H NMR spectrum (600MHz, DMSO-d6) of compound a

# Figure S4-2. 13C NMR spectrum (150MHz, DMSO-d6) of compound a

# Figure S5-1. 1H NMR spectrum (600MHz, DMSO-d6) of compound b

# Figure S5-2. 13C NMR spectrum (150MHz, DMSO-d6) of compound b

# Figure S6-1. 1H NMR spectrum (600MHz, DMSO-d6) of compound c

# Figure S6-2. 13C NMR spectrum (150MHz, DMSO-d6) of compound c

# Figure S7-1. 1H NMR spectrum (600MHz, DMSO-d6) of compound d

# Figure S7-2. 13C NMR spectrum (150MHz, DMSO-d6) of compound d

# Figure S8-1. 1H NMR spectrum (600MHz, DMSO-d6) of compound e

# Figure S8-2. 13C NMR spectrum (150MHz, DMSO-d6) of compound e
